# Supplementary material for: Myocyte-specific enhancer factor 2C: a novel target gene of miR-214-3p in suppressing angiotensin II-induced cardiomyocyte hypertrophy
Source: PubMed Central journal article supplement (PMC5087095; doi:10.1038/srep36146), 2016-10-31
Supplement: srep36146-s1.pdf [file srep36146-s1.pdf]

**Myocyte-specific enhancer factor 2C: a novel target gene of miR-214-3p in suppressing angiotensin II-induced cardiomyocyte hypertrophy**

Chun-Mei Tang<sup>1,2,3\*</sup>, Fang-zhou Liu<sup>1,2\*</sup>, Jie-Ning Zhu<sup>1,2</sup>, Yong-Heng Fu<sup>1,2</sup>, Qiu-Xiong Lin<sup>1,2</sup>,  
Chun-Yu Deng<sup>1,2</sup>, Zhi-Qin Hu<sup>1,2,3</sup>, Hui Yang<sup>1,2</sup>, Xi-Long Zheng<sup>4</sup>, Jian-Ding Cheng<sup>5</sup>, Shu-Lin  
Wu<sup>1,2</sup> and Zhi-Xin Shan<sup>a,1,2</sup>

<sup>1</sup> Guangdong Cardiovascular Institute, Guangdong Provincial Key Laboratory of Clinical Pharmacology, Guangzhou 510080, China

<sup>2</sup> Guangdong General Hospital, Guangdong Academy of Medical Sciences, Guangzhou 510080, China

<sup>3</sup> Southern Medical University, Guangzhou 510515, China

<sup>4</sup>The Libin Cardiovascular Institute of Alberta, Department of Biochemistry & Molecular Biology, The University of Calgary, Calgary, Alberta, Canada T2N 1N4

<sup>5</sup>Department of Forensic Pathology, Zhongshan School of Medicine, Sun Yat-sen University, Guangzhou 510080, China

<sup>a</sup>Email: zhixinshan@aliyun.com

\* These authors contributed equally to this work.

## Supplementary

**Table 1 Primers used in qRT-PCR assay**

| Gene                 | Sequence (5'- 3')                                                                                                          | Product size (bp) |
|----------------------|----------------------------------------------------------------------------------------------------------------------------|-------------------|
| <i>MEF2C</i>         | F, GGTAACACAGGCGGTCTGAT<br>R, ATAAGAACGCGGAGATCTGG                                                                         | 197               |
| <i>GAPDH</i>         | F, CAAGAAGGTGGTGAAGCAGG<br>R, CCACCCTGTTGCTGTAGCC                                                                          | 200               |
| Mature<br>miR-214-3p | RT, GTCGTATCCAGTGC GTGTCGTGGAGT<br>CGGCAATTGCACTGGATACGACTGCCTG<br>F, GTCCGCACAGCAGGCACAGACAGGCAGT<br>R, GTGCGTGTCGTGGAGTC | 76                |
| U6                   | RT, GTCGTATCCAGTGC GTGTCGTGGAGT<br>CGGCAATTGCACTGGATACGAC<br>F, GTCCGCGTGCTCGCTTCGGCAGC<br>R, GTGCGTGTCGTGGAGTC            | 160               |

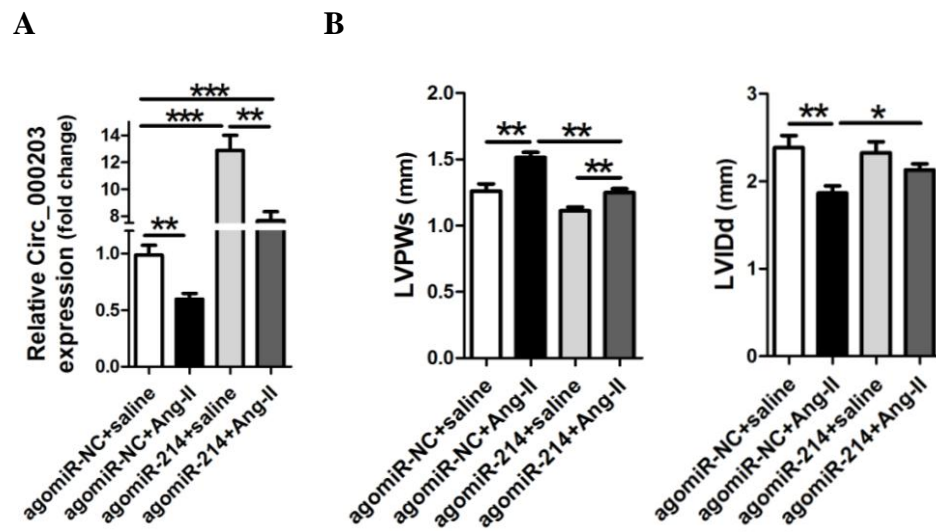

**Figure 1 Determination of miR-214-3p in mouse myocardium and representative variables of echocardiograph assay in mice.** A. Expression of miR-214-3p in mouse myocardium. B. The variables of echocardiograph assay, LVPWs and LVIDd, in mice.

Data are shown as mean  $\pm$  sem, \* $p$ <0.05, \*\* $p$ <0.01, \*\*\* $p$ <0.001. N=6.
